# Supplementary material for: Impact of sugar syrup and pollen diet on the bacterial diversity in the gut of indoor-reared bumblebees (Bombus terrestris)
Source: Springer Nature journal article supplement (doi:10.1007/s13592-015-0399-1), 2015-10-23
Supplement: MOESM1 [file 13592_2015_399_MOESM1_ESM.pdf]

**Impact of sugar syrup and pollen diet on the bacterial diversity in the gut of  
indoor-reared bumblebees (*Bombus terrestris*)**

Annelies Billiet, Ivan Meeus, Filip Van Nieuwerburgh, Dieter Deforce, Felix Wäckers, Guy Smagghe\*

\*Corresponding author:

Prof. Guy Smagghe

Laboratory of Agrozoology, Department of Crop Protection, Faculty of Bioscience Engineering,  
Ghent University, Coupure Links 653, B-9000 Ghent, Belgium

Email: [Guy.Smagghe@ugent.be](mailto:Guy.Smagghe@ugent.be)

**Fig. S1** Phylogenetic tree derived from the V4 region of the 16S rRNA gene sequence of *Bifidobacteriaceae* occurring in the digestive tract of *Bombus*, showing the position of the *Bifidobacteria* (OTU005 and OTU006) found in our study.

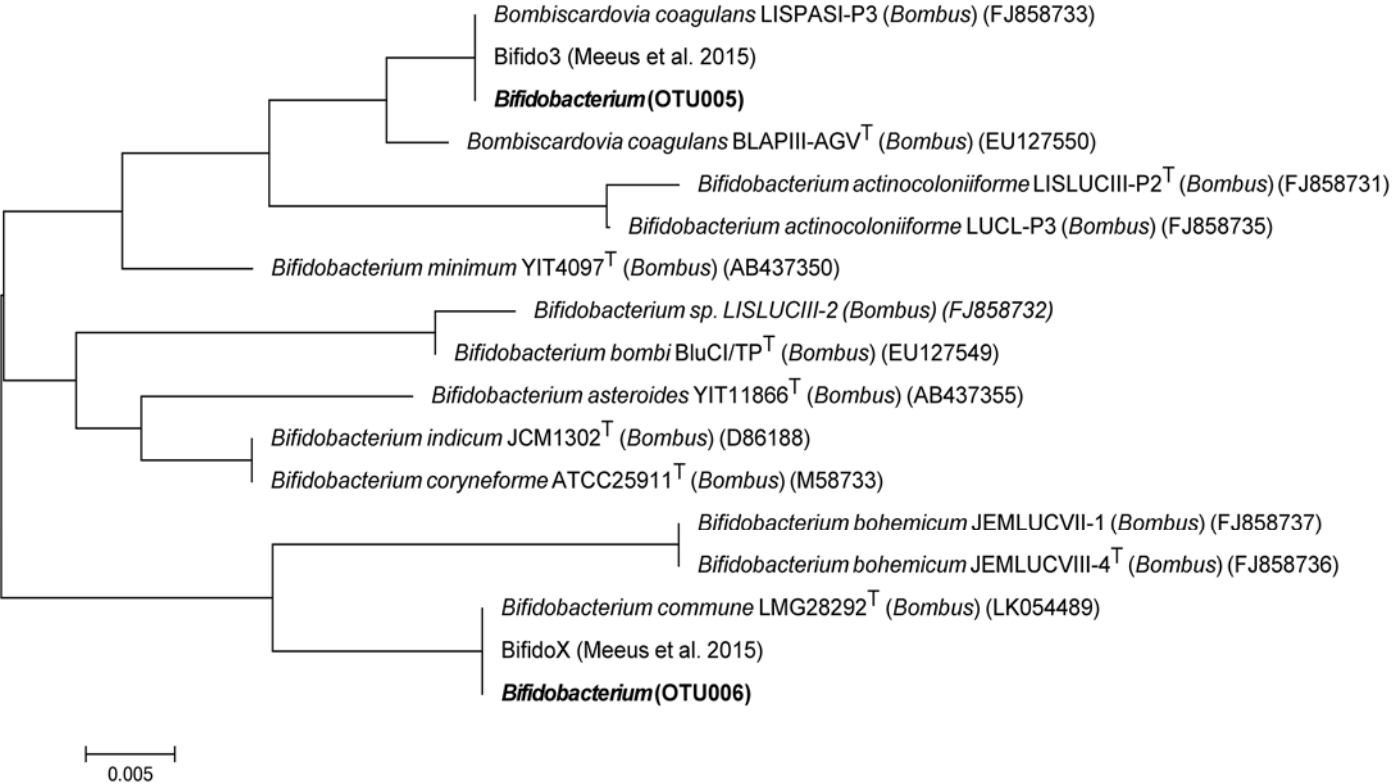

**Fig. S2** Phylogenetic tree derived from the V4 region of the 16S rRNA gene sequence of *Lactobacillaceae* and *Bacillaceae* occurring in the digestive tract of *Bombus* and *Apis*, showing the position of the *Lactobacilli* (OTU003 and OTU004) and *Bacillaceae* (OTU009) found in our study.

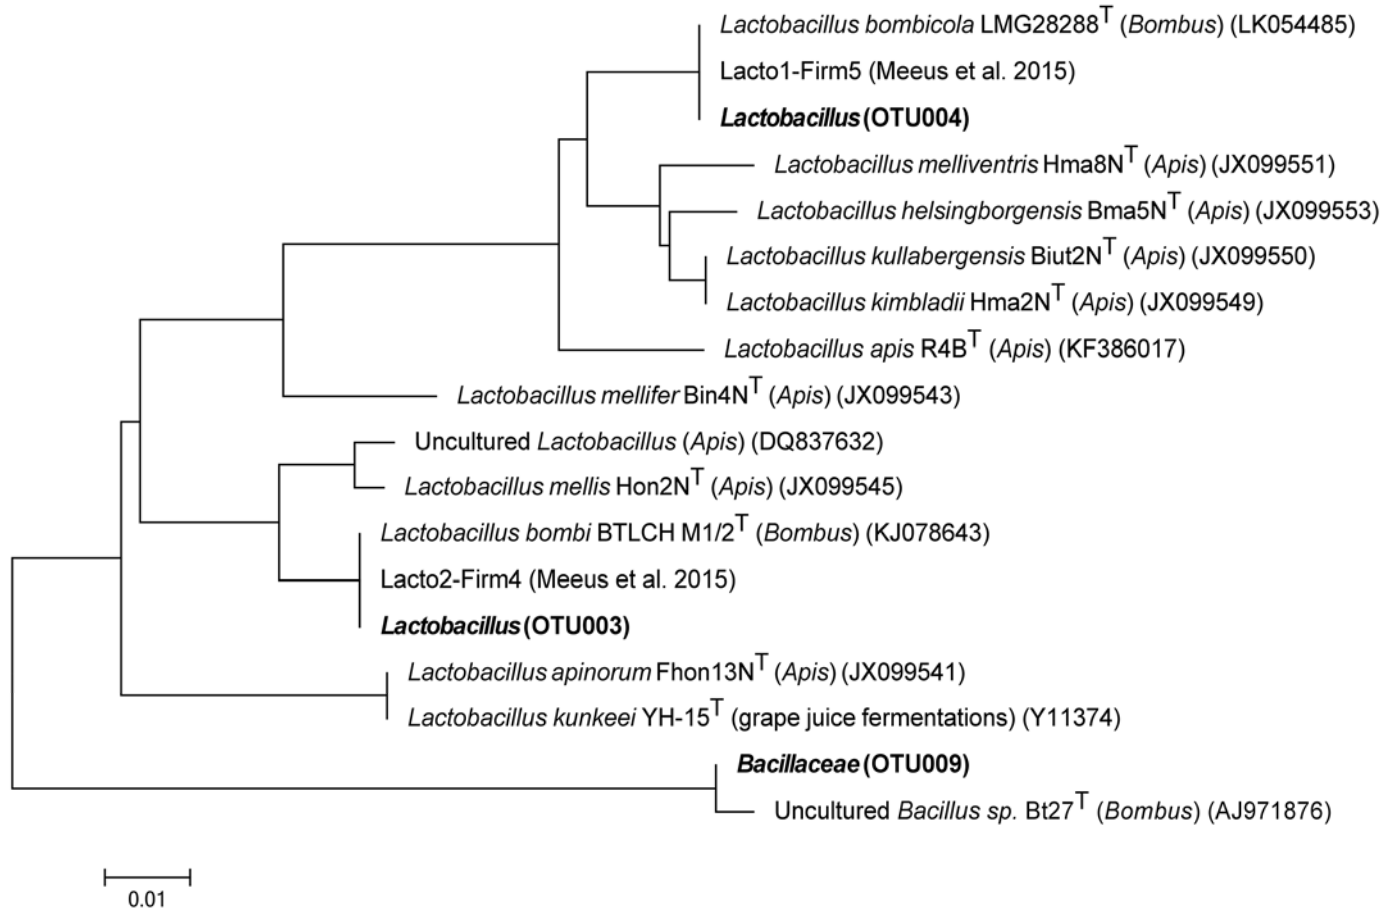

**Table S1** Taxonomic identification of OTUs in reared bumblebees and their closest match in GenBank and EzBioCloud.

| <b>Identification of OTUs</b><br>Phylum Class <i>Family</i> Genus                        | <b>Matching basepairs to best match in <i>Bombus</i> or <i>Apis</i></b>                                            | <b>Name used here</b>                         |
|------------------------------------------------------------------------------------------|--------------------------------------------------------------------------------------------------------------------|-----------------------------------------------|
| <b>Proteobacteria</b> Betaproteobacteria<br><i>Neisseriaceae</i> <i>Snodgrassella</i>    | 253/253 JQ746649 <i>Snodgrassella alvi</i> strain wkB29                                                            | <i>Snodgrassella</i>                          |
| <b>Proteobacteria</b> Gammaproteobacteria<br><i>Orbaceae</i> <i>Gilliamella</i>          | 253/253 JQ936676 <i>Gilliamella apicola</i> strain wkB30                                                           | <i>Gilliamella</i>                            |
| <b>Firmicutes</b> Bacilli<br><i>Lactobacillaceae</i> <i>Lactobacillus</i>                | 253/253 LK054485 <i>Lactobacillus bombicola</i> LMG 28288 <sup>T</sup><br>253/253 Lacto1-Firm5 (Meeus et al. 2015) | <i>L. bombicola</i>                           |
| <b>Firmicutes</b> Bacilli<br><i>Lactobacillaceae</i> <i>Lactobacillus</i>                | 253/253 KJ078643 <i>Lactobacillus bombi</i> BTLCH M 1/2 <sup>T</sup><br>253/253 Lacto2-Firm4 (Meeus et al. 2015)   | <i>L. bombi</i>                               |
| <b>Firmicutes</b> Bacilli<br><i>Bacillaceae</i>                                          | 252/253 AJ971876 Uncultured <i>Bacillus</i> sp. Bt27                                                               | <i>Bacillaceae</i>                            |
| <b>Actinobacteria</b> Actinobacteria<br><i>Bifidobacteriaceae</i>                        | 253/253 FJ858733 <i>Bombiscardovia coagulans</i> LISPASI-P3<br>253/253 Bifido3 (Meeus et al. 2015)                 | <i>Bombiscardovia coagulans</i><br>LISPASI-P3 |
| <b>Actinobacteria</b> Actinobacteria<br><i>Bifidobacteriaceae</i> <i>Bifidobacterium</i> | 253/253 LK054489 <i>Bifidobacterium commune</i> LMG 28292 <sup>T</sup><br>253/253 BifidoX (Meeus et al. 2015)      | <i>B. commune</i>                             |

**References:**

Meeus, I., Parmentier, L., Billiet, A., Maebe, K., Van Nieuwerburgh, F., Deforce, D., Wäckers, F., Vandamme, P., Smagghe, G. (2015) 16S rRNA amplicon sequencing demonstrates that indoor-reared bumblebees (*Bombus terrestris*) harbor a core subset of bacteria normally associated with the wild host. PLoS One. **10** (4), e0125152
